# Supplementary material for: Chitosan-Based Membranes for Skin Wound Repair in a Dorsal Fold Chamber Rat Model
Source: MDPI journal article supplement (doi:10.3390/pharmaceutics14122736), 2022-12-07
Supplement: s1 [file s1]

# Chitosan-Based Membranes for Skin Wound Repair in a Dorsal Fold Chamber Rat Model

Maria Helena Casimiro <sup>1,\*</sup>, Luís M. Ferreira <sup>1,2</sup>, Pedro M. P. Santos <sup>1</sup>, João P. Leal <sup>2,3</sup>, Gabriela Rodrigues <sup>4</sup>, Inês Iria <sup>5</sup>, Sara Alves <sup>6</sup>, Diogo Pais <sup>6</sup> and Diogo Casal <sup>7,\*</sup>

- <sup>1</sup> Centro de Ciências e Tecnologias Nucleares (C2TN), Instituto Superior Técnico (IST), Universidade de Lisboa, 2695-066 Bobadela, Portugal; ferreira@ctn.tecnico.ulisboa.pt (L.M.F.); psantos@ctn.tecnico.ulisboa.pt (P.M.P.S.)
  - <sup>2</sup> Departamento de Engenharia e Ciências Nucleares (DECN), Instituto Superior Técnico (IST), Universidade de Lisboa, 2695-066 Bobadela, Portugal; jpleal@ctn.tecnico.ulisboa.pt
  - <sup>3</sup> Centro de Química Estrutural (CQE), Instituto Superior Técnico (IST), Universidade de Lisboa, 2695-066 Bobadela, Portugal
  - <sup>4</sup> Centro de Ecologia, Evolução e Alterações Ambientais (cE3c) & CHANGE—Global Change and Sustainability Institute, Departamento de Biologia Animal, Faculdade de Ciências, Universidade de Lisboa (FCUL), 1749-016 Lisboa, Portugal; mgrdrigues@fc.ul.pt
  - <sup>5</sup> Instituto de Investigação do Medicamento (iMed ULisboa), Faculdade de Farmácia, Universidade de Lisboa, 1649-003 Lisboa, Portugal; inesraqueliria@gmail.com
  - <sup>6</sup> Departamento de Anatomia, NOVA Medical School | Faculdade de Ciências Médicas (NMS|FCM), Universidade NOVA de Lisboa, 1169-056 Lisboa, Portugal; saraalves79@hotmail.com (S.A.); diogo.pais@nms.unl.pt (D.P.)
  - <sup>7</sup> Centro de Estudos de Doenças Crónicas (CEDOC), NOVA Medical School | Faculdade de Ciências Médicas (NMS|FCM), Universidade NOVA de Lisboa, 1150-082 Lisboa, Portugal
- \* Correspondence: casimiro@ctn.tecnico.ulisboa.pt (M.H.C.); diogo\_bogalhao@yahoo.co.uk (D.C.); Tel.: +351-219946045 (M.H.C.); +351-916117315 (D.C.)

**Citation:** Casimiro, M.H.; Ferreira, L.M.; Santos, P.M.P.; Leal, J.P.; Rodrigues, G.; Iria, I.; Alves, S.; Pais, D.; Casal, D. Chitosan-Based Membranes for Skin Wound Repair in a Dorsal Fold Chamber Rat Model. *Pharmaceutics* **2022**, *14*, 2736. <https://doi.org/10.3390/pharmaceutics14122736>

Academic Editor: Katarína Valachová

Received: 9 November 2022

Accepted: 1 December 2022

Published: 7 December 2022

**Publisher's Note:** MDPI stays neutral with regard to jurisdictional claims in published maps and institutional affiliations.

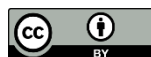

**Copyright:** © 2022 by the authors. Submitted for possible open access publication under the terms and conditions of the Creative Commons Attribution (CC BY) license (<https://creativecommons.org/licenses/by/4.0/>).

## S1. CK5 Protocol Summary

### Procedure: U ultraView DAB (v1.02.0018)

### BenchMark ULTRA IHC/ISH Staining Module

- 1 Baking [Selected]
  - 2 Warmup Slide to [72 Deg C], and Incubate for [4 Minutes] (Baking)
  - 3 Deparaffinization [Selected]
  - 4 Warmup Slide to [74 Deg C] from Medium Temperatures (Deparaffinization)
  - 5 Cell Conditioning [Selected]
  - 6 ULTRA Conditioner #1 [Selected]
  - 7 Warmup Slide to [97 Deg C], and Incubate for 8 Minutes (Cell Conditioner #1)
  - 8 20 minutes of ULTRA CC1 [Selected]
  - 9 36 minutes of ULTRA CC1 [Selected]
  - 10 52 minutes of ULTRA CC1 [Selected]
  - 11 Enzyme [Selected]
  - 12 Apply One Drop of [PROTEASE 3] (Enzyme), Apply Coverslip, and Incubate for [8 Minutes]
  - 13 Ab Incubation Temperatures [Selected]
  - 14 Warmup Slide to [39 Deg C], and Incubate for 4 Minutes (Antibody)
  - 15 Titration [Selected]
  - 16 Hand Apply (Primary Antibody), and Incubate for [0 Hr 32 Min]
  - 17 Counterstain [Selected]
  - 18 Apply One Drop of [HEMATOXYLIN] (Counterstain), Apply Coverslip, and Incubate for [4 Minutes]
  - 19 Post Counterstain [Selected]
  - 20 Apply One Drop of [BLUING REAGENT] (Post Counterstain), Apply Coverslip, and Incubate for [4 Minutes]
- \* one drop is one reagent dispense

CHLC-H.S.JOSE, LISBOA  
VSS v12.3.1 Build 18312.1

## S2. Vimentin Protocol Summary

**Procedure: U ultraView DAB (v1.02.0018)**

**BenchMark ULTRA IHC/ISH Staining Module**

- 1 Baking [Selected]
  - 2 Warmup Slide to [75 Deg C], and Incubate for [4 Minutes] (Baking)
  - 3 Deparaffinization [Selected]
  - 4 Warmup Slide to [72 Deg C] from Medium Temperatures (Deparaffinization)
  - 5 Extended Depar [Selected]
  - 6 Cell Conditioning [Selected]
  - 7 ULTRA Conditioner #1 [Selected]
  - 8 Warmup Slide to [95 Deg C], and Incubate for 8 Minutes (Cell Conditioner #1)
  - 9 20 minutes of ULTRA CC1 [Selected]
  - 10 36 minutes of ULTRA CC1 [Selected]
  - 11 Ab Incubation Temperatures [Selected]
  - 12 Warmup Slide to [37 Deg C], and Incubate for 4 Minutes (Antibody)
  - 13 Titration [Selected]
  - 14 Hand Apply (Primary Antibody), and Incubate for [0 Hr 16 Min]
  - 15 Counterstain [Selected]
  - 16 Apply One Drop of [HEMATOXYLIN] (Counterstain), Apply Coverslip, and Incubate for [4 Minutes]
  - 17 Post Counterstain [Selected]
  - 18 Apply One Drop of [BLUING REAGENT] (Post Counterstain), Apply Coverslip, and Incubate for [4 Minutes]
- \* one drop is one reagent dispense
- CHLC-H.S.JOSE, LISBOA  
VSS v12.3.1 Build 18312.1

## S3. CD31 Protocol Summary

**Procedure: U ultraView DAB (v1.02.0018)**

**BenchMark ULTRA IHC/ISH Staining Module**

- 1 Baking [Selected]
- 2 Warmup Slide to [75 Deg C], and Incubate for [4 Minutes] (Baking)
- 3 Deparaffinization [Selected]
- 4 Warmup Slide to [74 Deg C] from Medium Temperatures (Deparaffinization)
- 5 Extended Depar [Selected]
- 6 Cell Conditioning [Selected]
- 7 ULTRA Conditioner #1 [Selected]
- 8 Warmup Slide to [95 Deg C], and Incubate for 8 Minutes (Cell Conditioner #1)
- 9 20 minutes of ULTRA CC1 [Selected]
- 10 36 minutes of ULTRA CC1 [Selected]
- 11 52 minutes of ULTRA CC1 [Selected]
- 12 64 minutes of ULTRA CC1 [Selected]
- 13 Ab Incubation Temperatures [Selected]
- 14 Warmup Slide to [37 Deg C], and Incubate for 4 Minutes (Antibody)
- 15 Antibody [Selected]
- 16 Apply One Drop of [CD31 (JC70)] (Antibody), Apply Coverslip, and Incubate for [0 Hr 32 Min]
- 17 Counterstain [Selected]

18 Apply One Drop of [HEMATOXYLIN] (Counterstain), Apply Coverslip, and Incubate for [4 Minutes]

19 Post Counterstain [Selected]

20 Apply One Drop of [BLUING REAGENT] (Post Counterstain), Apply Coverslip, and Incubate for [4 Minutes]

\* one\* one drop is one reagent dispense

CHLC-H.S.JOSE, LISBOA

VSS v12.3.1 Build 18312.1
